# Supplementary material for: Long-Term Social Human-Robot Interaction for Neurorehabilitation: Robots as a Tool to Support Gait Therapy in the Pandemic
Source: Frontiers journal article supplement (doi:10.3389/fnbot.2021.612034), 2021-02-23
Supplement: Table_1.pdf [file Table_1.pdf]

# Supplementary Material

## 1 SUPPLEMENTARY DATA

**Table S1.** Perception Questionnaire for Patients.

| Construct | No. | Questions                                                                                     |
|-----------|-----|-----------------------------------------------------------------------------------------------|
| U         | 1   | I consider that using robots. It's an excellent tool to assist neurorehabilitation therapies. |
|           | 2   | I consider that my interaction with the robot was comfortable.                                |
|           | 3   | I enjoyed it when the robot gave me verbal encouragement when I did a good job.               |
|           | 4   | I'm satisfied with the work that the robot did.                                               |
|           | 5   | I consider that the robot adapts to my needs.                                                 |
| PU        | 1   | I consider that the interaction with the robot was beneficial for my recovery.                |
|           | 2   | I consider that the role of the robot was necessary for therapy development.                  |
|           | 3   | I think that the use of the robot helps me to compromise me to do a good job.                 |
| S         | 1   | I feel safe at the therapies working with the robot.                                          |
|           | 2   | I consider it was easy to give information to the robot.                                      |
| EU        | 1   | I consider that the robot is easy to use.                                                     |
|           | 2   | I consider that using the robot didn't affect the time of therapy sessions.                   |
|           | 3   | I consider that the robot's instructions were clear.                                          |
| PT        | 1   | The robot made me confident.                                                                  |
|           | 2   | I did instruction the robot told me because I trusted him.                                    |
|           | 3   | I like using the robot during the therapies.                                                  |
|           | 4   | It gave me confidence that the robot guides my therapy.                                       |
| PS        | 1   | I consider the robot a pleasant conversational partner.                                       |
|           | 2   | I find the robot pleasant to interact with.                                                   |
|           | 3   | I feel the robot understands me.                                                              |
|           | 4   | I think the robot is friendly.                                                                |
| SP        | 1   | When interacting with the robot, I felt like I'm talking to a real person.                    |
|           | 2   | It sometimes felt as if the robot was looking at me.                                          |
|           | 3   | I can imagine the robot to be a living creature.                                              |
|           | 4   | I often think the robot is not a real person.                                                 |
|           | 5   | Sometimes the robot seems to have real feelings.                                              |

**Table S2.** COVID19-related questionnaire for Clinicians.

| Question number | Description                                                                                                                              |
|-----------------|------------------------------------------------------------------------------------------------------------------------------------------|
| 1               | The robot could be a useful tool to support neurorehabilitation with Lokomat during the COVID-19 Pandemic.                               |
| 2               | If I had the possibility, I would use the social robot as a platform in neurorehabilitation with Lokomat during th COVID-19 Pandemic.    |
| 3               | The robot can promote physical distancing in the neurorehabilitation with Lokomat.                                                       |
| 4               | I think the robot can support my tasks within the session during the pandemic.                                                           |
| 5               | I think the social robot can be a safe tool to continue neurorehabilitation with Lokomat during the COVID-19 pandemic.                   |
| 6               | I would recommend to other colleagues/institutions the use of social robotics as a tool in the management of the COVID-19 pandemic.      |
| Open Question 1 | Mention 3 advantages of using a social robot in neurorehabilitation with Lokomat during the COVID-19 pandemic.                           |
| Open Question 2 | Mention 3 disadvantages of using a social robot in neurorehabilitaton with Lokomat during the COVID-19 pandemic.                         |
| Open Question 3 | Mention3 features you would added to the robot in order to improve its role in neurorehabilitation with lokomat during COVID-19 pandemic |
